# Supplementary material for: Effective and Efficient Pretreatment of Polyimide Substrates by Capacitively Coupled Plasma for Coating the Composites of Tetracycline-Imprinted Polymers and Quantum Dots: Comparison with Chemical Pretreatment
Source: MDPI journal article supplement (doi:10.3390/s20092723), 2020-05-10
Supplement: s1 [file s1]

## **Supplementary Information**

Effective and efficient pretreatment of polyimide substrates by capacitively coupled plasma for coating the composites of tetracycline-imprinted polymers and quantum dots: Comparison with chemical pretreatment

Ching-Bin Ke <sup>1</sup>, Jian-Lian Chen <sup>2, \*</sup>

<sup>1</sup> Department of Beauty and Health Care, Min-Hwei Junior College of Health Care Management, No.1116, Sec 2, Zhongshan E. Rd., Tainan 73658, Taiwan

<sup>2</sup> School of Pharmacy, China Medical University, No. 91 Hsueh-Shih Road, Taichung 40402, Taiwan

\* Correspondence: [cjl@mail.cmu.edu.tw](mailto:cjl@mail.cmu.edu.tw)

Figure S1. Fluorescence measurement of Tc samples.

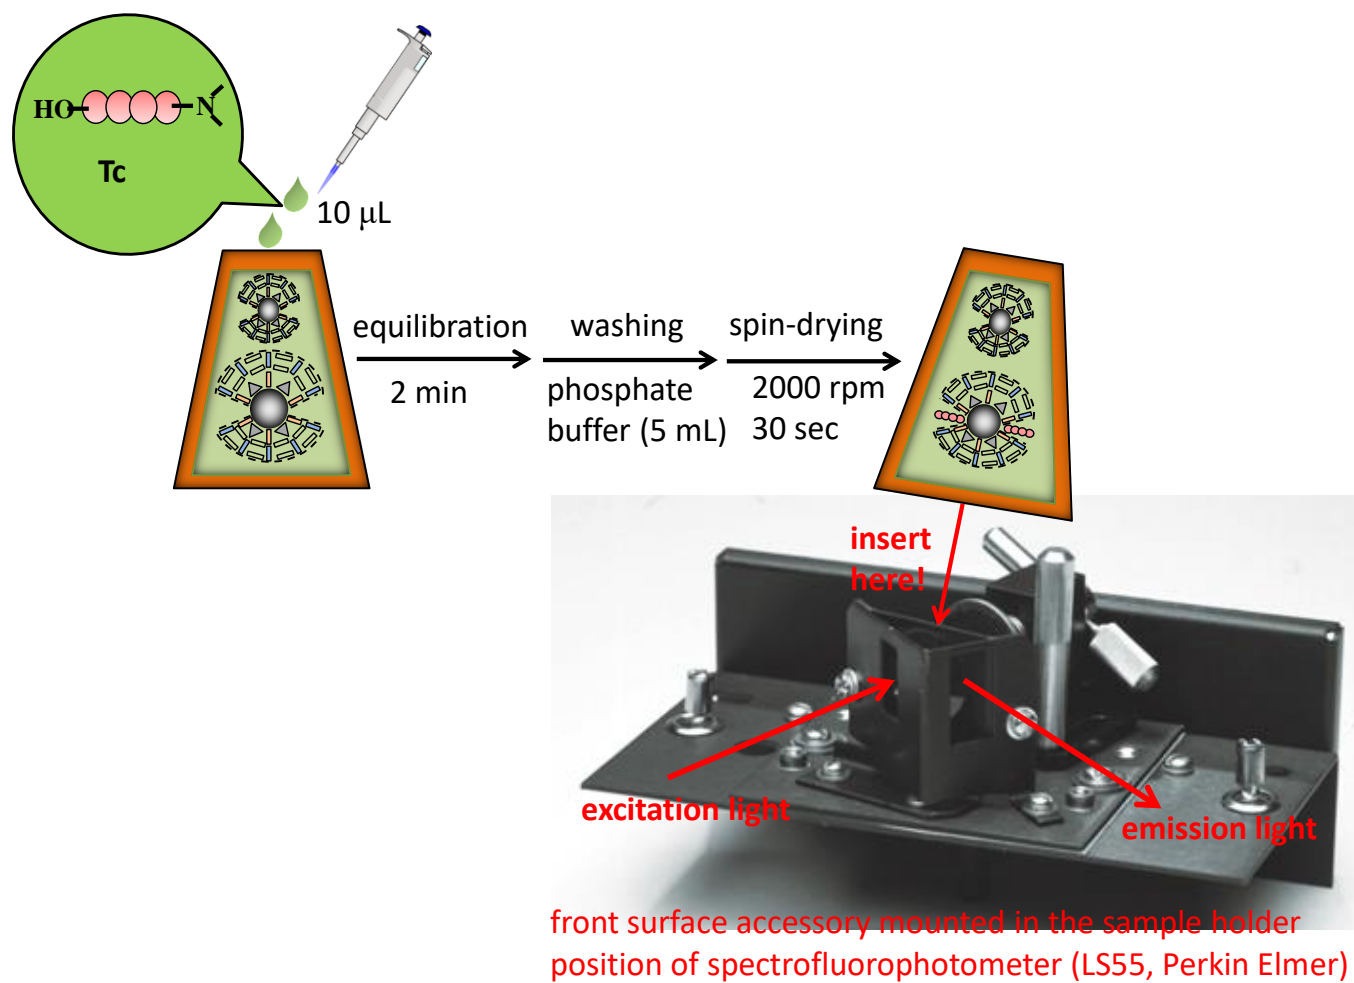

Figure S2. The PIs treated with  $\text{O}_2$  plasma for (a) 2 min and (b) 3 min.

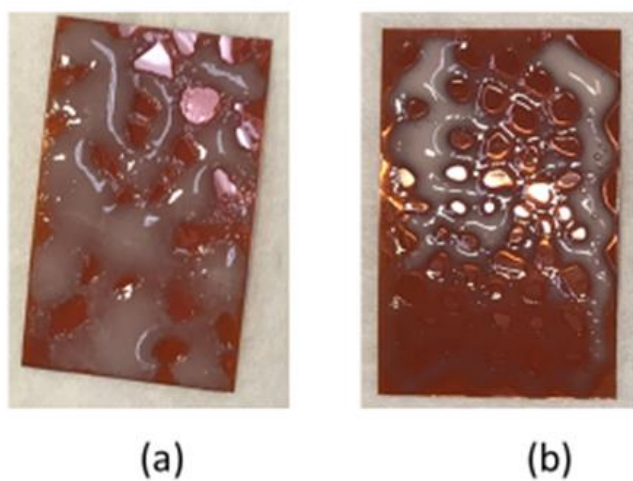

Figure S3. SEM images of the cross-section of the complete MIP-plasma-PI, which thickness is roughly estimated to be around 100  $\mu\text{m}$ .

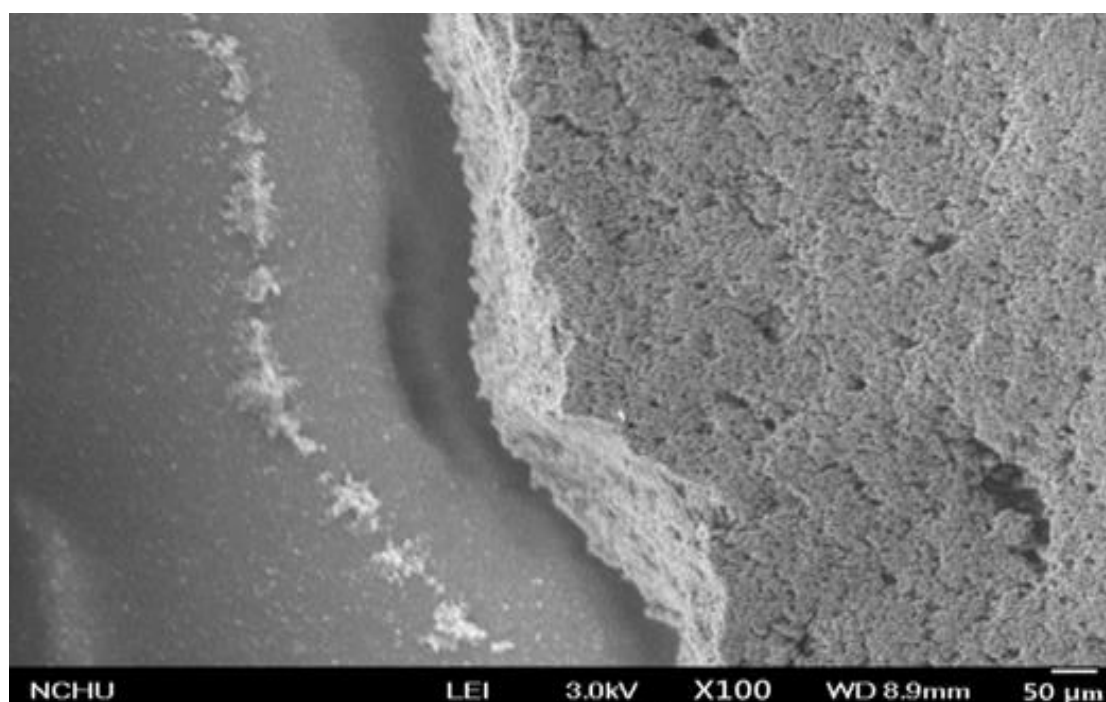

Figure S4. The  $\Delta F$  values observed for the addition of tetracycline (Tc) template and other samples in 0.56 mM onto MIP-plasma-PI and NIP-plasma-PI plates. Samples: oxytetracycline (Oxy), doxycycline (Doxy), minocycline (Mino), and methacycline (Meth),  $\beta$ -estradiol (beta-E), cholic acid (CA), and hydrocortisone (HC).

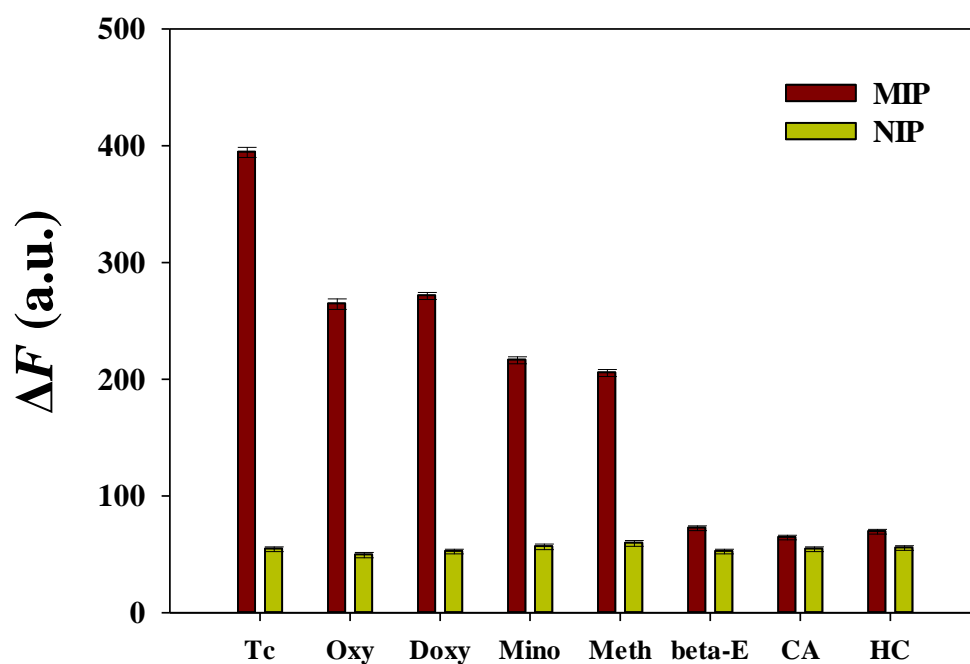

Table S1

Comparison of the fabrication and analytical performance of the sensor plates bound with tetracycline (Tc)-imprinted MIP-QD composites

|                                                                                            | MIP-chemical-glass                                                                                                                             | MIP-chemical-PI                                                                                                                                | MIP-plasma-PI                                                                                                                                  |
|--------------------------------------------------------------------------------------------|------------------------------------------------------------------------------------------------------------------------------------------------|------------------------------------------------------------------------------------------------------------------------------------------------|------------------------------------------------------------------------------------------------------------------------------------------------|
| MIP bases                                                                                  | Polysilicate; sol-gel polymerization                                                                                                           | Polyacrylate; radical-initiated polymerization                                                                                                 | Polyacrylate; radical-initiated polymerization                                                                                                 |
| Treated substrates                                                                         | Silanized glass sheet                                                                                                                          | Aminolyzed polyimide film                                                                                                                      | O <sub>2</sub> plasma-treated polyimide film                                                                                                   |
| Bonding of MIP-QDs on substrates                                                           | Spin-coating the MIP-QD solution on glass, then baking at r.t. for 6 hours                                                                     | Spin-coating the MIP-QD solution on PI, then baking at 65 °C for 15 min                                                                        | Dripping the MIP-QD solution on PI, then baking at 50 °C for 15 min                                                                            |
| Stripping Tc template                                                                      | Immersion in EtOH/H <sub>2</sub> O = 1 (v/v) for 1 min                                                                                         | Immersion in EtOH/H <sub>2</sub> O = 2 (v/v) for 6 min                                                                                         | Immersion in EtOH/H <sub>2</sub> O = 2 (v/v) for 2 min (x3)                                                                                    |
| Equilibrium time after loading Tc (10 µL) on the sensors                                   | Tc at 0.56 mM for 20 min                                                                                                                       | Tc at 2.2 mM for 3 min                                                                                                                         | Tc at 0.56 mM for 2 min                                                                                                                        |
| Role of Tc at emission maximum wavelength                                                  | Passivator at 560 nm                                                                                                                           | Quencher at 575 nm                                                                                                                             | Quencher at 575 nm                                                                                                                             |
| Linear relation with the Tc concentration*                                                 | $(F-F_0)/I_0$ vs. [Tc] at 70–2200 µM ( $R^2 = 0.9992$ )                                                                                        | $(F_0-F)$ vs. [Tc] at 70–2200 µM ( $R^2 = 0.9993$ )                                                                                            | $(F_0-F)$ vs. [Tc] at 5.0–3000 µM ( $R^2 = 0.9995$ )                                                                                           |
| RSD; LOD**                                                                                 | RSD = 2.8% ( $n = 10$ ) at 70 µM; LOD = 2.1 µM                                                                                                 | RSD = 7.6% ( $n = 10$ ) at 70 µM; LOD = 8.8 µM                                                                                                 | RSD = 2.2% ( $n = 10$ ) at 5.0 µM; LOD = 0.2 µM                                                                                                |
| Imprinting factors***                                                                      | Tc = 5.6, oxy = 4.4, dox = 3.5, min = 2.6, met = 2.3, steroids $\approx 1$                                                                     | Tc = 4.8, oxy = 4.0, dox = 3.5, min = 3.2, steroids $\approx 1$                                                                                | Tc = 7.2, oxy = 5.3, dox = 5.1, min = 3.8, met = 3.4, steroids $\approx 1$                                                                     |
| The highest tolerance concentrations of BSA and FBS for 97~98% recoveries of spiked Tc**** | 133 µg·mL <sup>-1</sup> (BSA, 98% recovery, RSD = 3.5%, $n = 5$ ) and 0.66 ppt (FBS, 97% recovery, RSD = 5.7%, $n = 5$ ) for spiked Tc (70 µM) | 200 µg·mL <sup>-1</sup> (BSA, 98% recovery, RSD = 8.2%, $n = 5$ ) and 1.00 ppt (FBS, 97% recovery, RSD = 9.5%, $n = 5$ ) for spiked Tc (70 µM) | 300 µg·mL <sup>-1</sup> (BSA, 98% recovery, RSD = 3.2%, $n = 5$ ) and 1.5 ppt (FBS, 98% recovery, RSD = 2.8%, $n = 5$ ) for spiked Tc (5.0 µM) |
| Recoveries of Tc spiking in liquid milk                                                    |                                                                                                                                                |                                                                                                                                                | spiking 5.0 µM Tc in untreated milk: recovery = 94.5% (RSD = 5.3%, $n = 5$ ); in pretreated milk: recovery = 97.4% (RSD = 2.5%, $n = 5$ )      |
| Reference                                                                                  | [34]                                                                                                                                           | [21]                                                                                                                                           | this study                                                                                                                                     |

\*  $F_0$  and  $F$  are the fluorescence intensities measured at the emission maximum wavelength before and after loading Tc.

\*\* LOD is defined as three times the standard deviation of the measurements ( $n = 10$ ) in the blank solution.

\*\*\* Oxytetracycline (oxy), doxycycline (dox), minocycline (min), and methacycline (met).

\*\*\*\* FBS is in solutions containing hemoglobin  $\leq 25 \text{ mg}\cdot\text{dL}^{-1}$ .
